# Supplementary material for: Electrospun fibers enhanced the paracrine signaling of mesenchymal stem cells for cartilage regeneration
Source: PubMed Central journal article supplement (PMC7860031; doi:10.1186/s13287-021-02137-8), 2021-02-03

**A**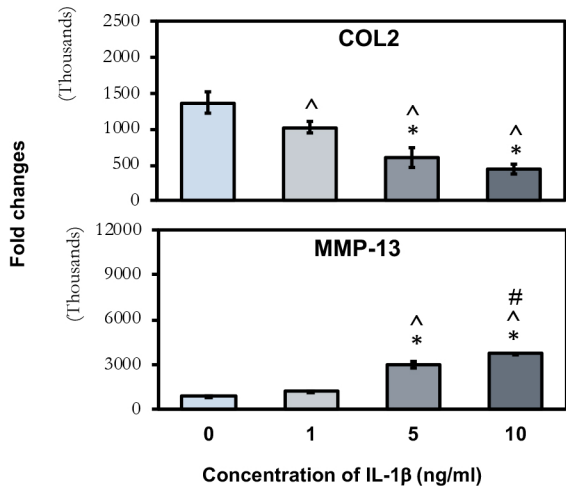**B**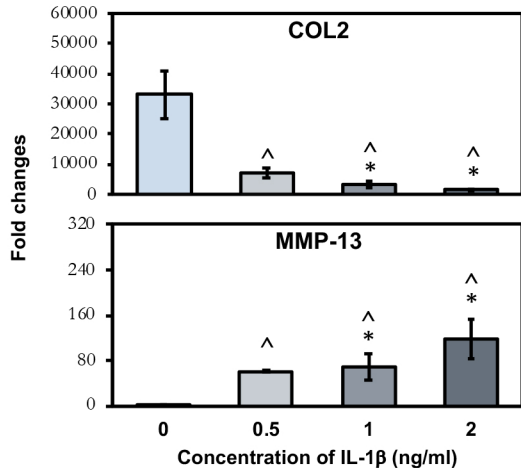

Supplement: 13287_2021_2137_MOESM1_ESM.pdf [file 13287_2021_2137_MOESM1_ESM.pdf]
