# Supplementary material for: Electrospun fibers enhanced the paracrine signaling of mesenchymal stem cells for cartilage regeneration
Source: PubMed Central journal article supplement (PMC7860031; doi:10.1186/s13287-021-02137-8), 2021-02-03
Supplement: 13287_2021_2137_MOESM2_ESM.pdf [file 13287_2021_2137_MOESM2_ESM.pdf]

| Species | Gene targets   | Primer sequences            |                                   |
|---------|----------------|-----------------------------|-----------------------------------|
| Human   | GDF-15         | Forward                     | 5' -TCAAGGTCGTGGGACGTGACA-3'      |
|         |                | Reverse                     | 5' - GCCGTGCGGACGAAGATTCT- 3'     |
|         | IL-8           | Forward                     | 5'-GACCACACTGCGCCAACAC-3'         |
|         |                | Reverse                     | 5'-CTTCTCCACAACCCTCTGCAC-3'       |
|         | COX-2          | Forward                     | 5'-CAGCACTTCACGCATCAGTTT-3'       |
|         |                | Reverse                     | 5'-GCGCAGTTTACGCTGTCTA-3'         |
|         | IL-6           | Forward                     | 5'-GATGGCTGAAAAAGATGGATGC-3'      |
|         |                | Reverse                     | 5'-TGGTTGGGTCAGGGGTGGTT-3'        |
|         | MMP-13         | Forward                     | 5'-TCCTCTTCTTGAGCTGGACTC-3'       |
|         |                | Reverse                     | 5'-CGCTCTGCAAACCTGGAGGTC-3'       |
|         | TGF- $\beta$ 1 | Forward                     | 5'-CGCATCCTAGACCCTTCTCCTC-3'      |
|         |                | Reverse                     | 5'-GGTGTCTCAGTATCCCACGGAAAT-3'    |
|         | BMP-2          | Forward                     | 5'-ATGGATTCGTGGTGGAAAGTG -3'      |
|         |                | Reverse                     | 5'-GTGGAGTTCAGATGATCAGC -3'       |
|         | FGF-2          | Forward                     | 5'-GGCTGTAGAACAAATGGCCT-3'        |
|         |                | Reverse                     | 5'-AGCCAACTCGTAACAATCCA-3'        |
|         | HGF            | Forward                     | 5'-CCCCATCGCCATCCCCTATG-3'        |
|         |                | Reverse                     | 5'-ACATCTATTAGCACATTGGTCTGCAGT-3' |
|         | IL-1Ra         | Forward                     | 5'-AAGATGTGCCTGTCCTGTGTCAA-3'     |
|         |                | Reverse                     | 5'-GTTCTCGCTCAGGTCAGTGATGTTA-3'   |
| GAPDH   | Forward        | 5'-ATGGGGAAGGTGAAGGTCG-3'   |                                   |
|         | Reverse        | 5'-TAAAAGCAGCCCTGGTGACC-3'  |                                   |
| COL2    | Forward        | 5'-GGCAATAGCAGGTTACGTACA-3' |                                   |

|         |          |         |                                 |
|---------|----------|---------|---------------------------------|
|         |          | Reverse | 5'-CGATAACAGTCTTGCCCCACTT-3'    |
|         | Aggrecan | Forward | 5'-ACTTC CGCTGGTCAGATGGA-3'     |
|         |          | Reverse | 5'-TCTCGTGCCAGATCATCACC-3'      |
|         | SOX-9    | Forward | 5'-AGTACCCGCACTTGCACAA-3'       |
|         |          | Reverse | 5'-CTCGTTCAGAAGTCT CCAGAGCTT-3' |
| Porcine | COX-2    | Forward | 5'-TTCAACCAGCAATTCCAATACCA -3'  |
|         |          | Reverse | 5'- GAAGGCGTCAGGCAGAAG-3'       |
|         | MMP-13   | Forward | 5'-CTTGTTTCTTGTTGCTGCCC-3'      |
|         |          | Reverse | 5'-GTTGGGGTCTTCATCTCCTG-3'      |
|         | GAPDH    | Forward | 5'-ATGGTGAAGGTCGGAGTGAA-3'      |
|         |          | Reverse | 5'-AATGAAGGGGTCATTGATGG-3'      |
|         | COL2     | Forward | 5'-TGAGAGGTCTTCCTGGCAA-3'       |
|         |          | Reverse | 5'-GAAGTCCCTGGAAGCCAGAT-3'      |
|         | Aggrecan | Forward | 5'-CATCACCGAGGGTGAAGC-3'        |
|         |          | Reverse | 5'-CCAGGGGCAAATGTAAAGG-3'       |
